# Supplementary material for: Ultrasound and Clinical Parameters in Patients with Hashimoto’s Thyroiditis Related to Dermatological Diseases: A Cross-Sectional Study
Source: Preprints.org preprint supplement (doi:10.20944/preprints202403.0724.v1), 2024-03-12
Supplement: Supplementary file 1 [file supplementary]

**Supplementary Table 1: Dermatological diseases found in patients with Hashimoto’s thyroiditis.**

| **Dermatological disease** | **n (%)** | **Known autoimmune etiology** |
| --- | --- | --- |
| Acne | 4 (4) | yes |
| Atopy | 4 (4) | yes |
| Seborrheic keratosis | 1 (1) | yes |
| Atopic dermatitis | 3 (3) | yes |
| Seborrheic dermatitis | 8 (8) | yes |
| Eczema | 4 (4) | yes |
| Erythema | 2 (2) | yes |
| Fibroids | 1 (1) | NO |
| Lentigo | 3 (3) | No |
| Lichen | 2 (2) | yes |
| Lipomas | 1 (1) | no |
| M dubray | 1 (1) | yes |
| Melanoma | 2 (2) | No |
| Melasma | 1 (1) | yes |
| Negative | 47 (47) |  |
| Neurodermatitis | 1 (1) | yes |
| Urticaria | 2 (2) | yes |
| Psoriasis | 6 (6) | Yes |
| Vitiligo | 2 (2) | Yes |
| Xerosis | 5 (5) | No |
| **Total** | **100 (100)** |  |
